# Supplementary material
Source: publisher figshare collection journal article supplement (https://gsajournals.figshare.com/ndownloader/files/17706203)
Supplement: Supplementary file 1 [file 17706203]

Breeding Program	Synonymous	Nonsynomymous	Deleterious
Busch Ag	3578	3906	271
Minnesota	7930	9031	500
North Dakota	13581	15166	1019
